# Supplementary material for: Predicting Therapy Success and Costs for Personalized Treatment Recommendations Using Baseline Characteristics: Data-Driven Analysis
Source: PubMed Central journal article supplement (PMC6123535; doi:10.2196/10275), 2018-08-21
Supplement: jmir_v20i8e10275_app1.pdf [file jmir_v20i8e10275_app1.pdf]

## Multimedia Appendix 1

Omitted Items:

| Item No. | Item Description                                                                                               |
|----------|----------------------------------------------------------------------------------------------------------------|
| 1        | Do you have access to a fast Internet connection (apref2)                                                      |
| 2        | Treatment program at other institution 1/2/3/4 (aTicp5d1/aTicp5e1/aTicp5f1/aTicp5g1)                           |
| 6        | Other primary care 1/2/3/4/5 (aTicp1i1/aTicp1j1/aTicp1h1/aTicp1g1/aTicp1k1)                                    |
| 11       | How many times did you consult other primary care 4/5 (aTicp1j2/aTicp1k2)                                      |
| 13       | Number of days a day-time treatment program (institution 2/3/4)<br>(aTicp5e2/aTicp5f2/aTicp5g2)                |
| 16       | Number of parts of days a part-time treatment program (institution 2/3/4)<br>(aTicp5e3/aTicp5f3/aTicp5g3)      |
| 19       | Other Tranquilizers or sleep medication (aTicp27/aTicp28)                                                      |
| 21       | Other mental care 1/2/3/4 (aTicp2h1/aTicp2i1/aTicp2j1/aTicp2k1)                                                |
| 25       | Other complementary by name 1/2/3/4/5 (aTicp3f1/aTicp3g1/aTicp3h1/aTicp3i1/aTicp3j1)                           |
| 30       | How many times did you consult other complementary therapists 2/3/4/5<br>(aTicp3g2/aTicp3h2/aTicp3i2/aTicp3j2) |
| 34       | Received domestic care, number of months (aTicp9a)                                                             |
| 35       | Other provider of treatment (atreat15b)                                                                        |
| 36       | Medication use (period Amitriptyline (Tryptizol) (aTicp11d1)                                                   |
| 37       | How long have you been in treatment (atreat15c)                                                                |
| 38       | Medication use (dosage Nortriptyline (Nortrilen) (aTicp16b)                                                    |
| 39       | Other type of treatment (atreat17a)                                                                            |
| 40       | Medication use (Frequency Nortriptyline (Nortrilen) (aTicp16c)                                                 |
| 41       | Depressive episode current (amini1)                                                                            |
| 42       | Medication use (period Nortriptyline (Nortrilen) (aTicp16d1)                                                   |
| 43       | Specify drugs taken (amini20b)                                                                                 |
| 44       | Antidepressants (aTicp20)                                                                                      |
| 45       | Specify drugs (amini20d)                                                                                       |
| 46       | Other antidepressants (aTicp21)                                                                                |
| 47       | Psychotic disorder current (amini21)                                                                           |
| 48       | Period other depressants (aTicp21d1)                                                                           |
| 49       | Self care (aEQ5D5L2)                                                                                           |
| 50       | Pain/Discomfort (aEQ5D5L4)                                                                                     |
| 51       | How many times did you consult the Speech therapist (aTicp1d)                                                  |
| 52       | Times of rehabilitation clinic admissions (aTicp6c1)                                                           |
| 53       | Other medication for mental health complaints (aTicp29)                                                        |
| 54       | Medication use (other period Amitriptyline (Tryptizol)) (aTicp11d2)                                            |
| 55       | Nights of rehabilitation clinic admissions (aTicp6c2)                                                          |
| 56       | Medication use (other medications for mental health complaints) (aTicp30)                                      |
| 57       | Medication use (period Flurazepam (Dalmadorm)) (aTicp25d1)                                                     |
| 58       | How many times did you consult other mental care 4 (aTicp2k2)                                                  |
| 59       | Type of other institution at which admissions 1 (aTicp6e1)                                                     |
| 60       | Period other medication for mental health complaints (aTicp30d1)                                               |
| 61       | How long have you been taking antipsychotic medication (atreat8)                                               |
| 62       | Type of other institution at which admissions 2 (aTicp6f1)                                                     |
| 63       | Other Treatment (atreat2b)                                                                                     |
| 64       | How long have you been taking this other medication (atreat12)                                                 |
| 65       | Times of other institution 2 admissions (aTicp6f2)                                                             |
| 66       | Anti-depressants (atreatMed)                                                                                   |
| 67       | Who is delivering the psychotherapy (atreat14a)                                                                |

|    |                                                                                                                      |
|----|----------------------------------------------------------------------------------------------------------------------|
| 68 | Nights of other institution admissions (aTicp6f3)                                                                    |
| 69 | Other provider of anti-depressants (atreat5a)                                                                        |
| 70 | Recency of hypomanic episode (amini6b)                                                                               |
| 71 | Type of other institution at which admissions 3 (aTicp6g1)                                                           |
| 72 | Who is providing the tranquilizers (atreat7)                                                                         |
| 73 | Abuse non-alcohol psychoactive substance use disorder current (amini20a)                                             |
| 74 | Times of other institution admissions (aTicp6g2)                                                                     |
| 75 | Other provider of antipsychotic medication (atreat9a)                                                                |
| 76 | Abuse non-alcohol psychoactive substance current (amini20c)                                                          |
| 77 | Nights of other institution admissions (aTicp6g3)                                                                    |
| 78 | Other provider of sleep medication (atreat11a)                                                                       |
| 79 | Depressive episode lifetime (amini23)                                                                                |
| 80 | Received nurse care, number of months, in last 3 months (aTicp7a)                                                    |
| 81 | Other provider of this other medication (atreat13a)                                                                  |
| 82 | Who is delivering the other treatment (atreat15a)                                                                    |
| 83 | Received daily care, number of months (aTicp8a)                                                                      |
| 84 | Other provider of psychotherapy (atreat14b)                                                                          |
| 85 | Received daily care, number of hours per week (aTicp8b)                                                              |
| 86 | Thoughts of Death or Suicide (aQIDS12)                                                                               |
| 87 | Medication use (Other medication for mental health complaints) (aTicp30a)                                            |
| 88 | Medication use (Nortriptyline (Nortrilen)) (aTicp16a)                                                                |
| 89 | How many times did you consult the Holistic therapist (aTicp3c)                                                      |
| 90 | Medication use (Amitryptiline (Tryptizol)) (aTicp11a)                                                                |
| 91 | Marital status (aMarital)                                                                                            |
| 92 | Hypomanic episode (amini6a)                                                                                          |
| 93 | How many times did you consult the Natural healer (aTicp3e)                                                          |
| 94 | How many times did you consult the Professional from a clinic for alcohol and drugs or similar institution (aTicp2f) |
| 95 | Who is providing the anti-depressants (atreat5)                                                                      |
| 96 | How long have you been taking tranquilizers (atreat6)                                                                |
| 97 | Who is providing this other medication (atreat13)                                                                    |
