# Supplementary material for: Predicting Therapy Success and Costs for Personalized Treatment Recommendations Using Baseline Characteristics: Data-Driven Analysis
Source: PubMed Central journal article supplement (PMC6123535; doi:10.2196/10275), 2018-08-21
Supplement: jmir_v20i8e10275_app2.pdf [file jmir_v20i8e10275_app2.pdf]

## Multimedia Appendix 2

Results for prediction performance based on sampling from normal and categorical distribution and all baseline features for varying machine learning approaches (MAE: mean absolute error, RMSE: root mean square error):

| Model            | Outcome |          | Costs in € |          |
|------------------|---------|----------|------------|----------|
|                  | $MAE_o$ | $RMSE_o$ | $MAE_c$    | $RMSE_c$ |
| SVR              | 0.0737  | 0.1014   | 6539.97    | 9466.11  |
| Regression Tree  | 0.0765  | 0.1040   | 6471.05    | 9346.40  |
| Ridge Regression | 0.0647  | 0.0870   | 6044.44    | 8395.56  |

Results for prediction performance based on sampling from normal and categorical distribution and selected baseline features for varying machine learning approaches (MAE: mean absolute error, RMSE: root mean square error):

| Model            | Outcome |          | Costs in € |          |
|------------------|---------|----------|------------|----------|
|                  | $MAE_o$ | $RMSE_o$ | $MAE_c$    | $RMSE_c$ |
| SVR              | 0.0598  | 0.0838   | 5195.46    | 8211.82  |
| Regression       | 0.0599  | 0.0794   | 5204.89    | 7194.91  |
| Regression Tree  | 0.0707  | 0.0958   | 6229.68    | 9278.88  |
| Ridge Regression | 0.0565  | 0.0746   | 5001.75    | 6921.86  |
