# Supplementary material for: Predicting Therapy Success and Costs for Personalized Treatment Recommendations Using Baseline Characteristics: Data-Driven Analysis
Source: PubMed Central journal article supplement (PMC6123535; doi:10.2196/10275), 2018-08-21
Supplement: jmir_v20i8e10275_app3.pdf [file jmir_v20i8e10275_app3.pdf]

### Multimedia Appendix 3

Important baseline features based on Lasso regression for TAU (including single levels for each item) and QALY prediction for  $\lambda=0.01485$ :

| Feature                                                                                     | Parameter coefficient |
|---------------------------------------------------------------------------------------------|-----------------------|
| (Intercept)                                                                                 | $3.897e-1$            |
| Cumulated PHQ value (aPHQScore)                                                             | $-3.013e-3$           |
| Anxiety/Depression (I am slightly anxious or depressed) (aEQ5D5L5)                          | $2.898e-2$            |
| How many times did you consult the General practitioner (aTicp1a)                           | $-1.732e-3$           |
| Mobility (I have no problems in walking about) (aEQ5D5L)                                    | $1.502e-2$            |
| General interest (I have virtually no interest in the activities I used to enjoy) (aQIDS13) | $-6.159e-3$           |
| Usual activities (I have severe problems doing my usual activities) (aEQ5D5L3)              | $-1.440e-2$           |
| Anxiety/Depression (I am severely anxious or depressed) (aEQ5D5L5)                          | $-9.663e-3$           |
| How many times did you consult other primary care (aTicp1h2)                                | $-3.168e-3$           |
| Medication use (other period other depressants 1) (aTicp20d2)                               | $-3.183e-3$           |
| How many times: medical specialist at an outpatient clinic (aTicp4)                         | $-2.726e-3$           |
| Medication use (dosage Venlafaxine (Efexor)) (aTicp19b)                                     | $-7.900e-5$           |
| Medication use (Frequency other depressants 1) (aTicp20c)                                   | $-1.710e-3$           |
| Agoraphobia current (yes) (amini11)                                                         | $-1.263e-3$           |
| Age at baseline (aAge)                                                                      | $-5.200e-5$           |

Important baseline features based on Lasso regression for BT (including single levels for each item) and QALY prediction for  $\lambda=0.01479$ :

| Feature                                                                                                                    | Parameter coefficient |
|----------------------------------------------------------------------------------------------------------------------------|-----------------------|
| (Intercept)                                                                                                                | $2.930e-1$            |
| Mobility (I have severe problems in walking about) (aEQ5D5L1)                                                              | $-1.760e-1$           |
| Mobility (I have no problems in walking about) (aEQ5D5L1)                                                                  | $3.180e-2$            |
| Cumulated PHQ value (aPHQScore)                                                                                            | $-2.220e-3$           |
| Energy level (I really cannot carry out most of my usual daily activities because I just do not have the energy) (aQIDS14) | $-1.863e-2$           |
| Anxiety/Depression (I am severely anxious or depressed) (aEQ5D5L5)                                                         | $-1.830e-2$           |
| Usual activities (I have no problems doing my usual activities) (aEQ5D5L3)                                                 | $1.630e-2$            |
| Usual activities (I have severe problems doing my usual activities) (aEQ5D5L3)                                             | $-1.806e-2$           |
| How many times did you consult other mental care 3 (aTicp2j2)                                                              | $-5.045e-3$           |
| Medication use (period Other medication for mental health complaints) (other) (aTicp29d1)                                  | $7.260e-2$            |
| How many times did you consult the general practitioner (aTicp1a)                                                          | $-2.890e-4$           |
| Trouble concentrating on things, such as reading the newspaper or watching television (Nearly every day) (aPHQ07)          | $-5.277e-3$           |
| How many times did you consult the Dietician (aTicp1e)                                                                     | $-1.050e-2$           |
| Who is providing the sleep medication (Psychiatrist) (atreat11)                                                            | $2.706e-3$            |
| Medication use (dosageFluoxetine (Prozac)) (aTicp14b)                                                                      | $-5.700e-5$           |

Important baseline features based on Lasso regression for TAU (including single levels for each item) and cost prediction for  $\lambda=433.83$ :

| Feature                                                                                                                           | Parameter coefficient |
|-----------------------------------------------------------------------------------------------------------------------------------|-----------------------|
| (Intercept)                                                                                                                       | 1.170e+6              |
| Little interest or pleasure in doing things (Several days) (aPHQ01)                                                               | -5.675e+2             |
| Trouble falling or staying asleep, or sleeping too much (Nearly every day) (aPHQ03)                                               | 1.401e+3              |
| Do you have a preference for one of the treatments offered (No preference) (apref1)                                               | -3.972e+2             |
| Do you have a preference for one of the treatments offered (Treatment as usual not including the online treatment) (apref1)       | -3.972e+2             |
| Mobility (I have no problems in walking about) (aEQ5D5L1)                                                                         | -8.392e+2             |
| Mobility (I have slight problems in walking about) (aEQ5D5L)                                                                      | 2.145e+2              |
| Anxiety/Depression (I am severely anxious or depressed) (aEQ5D5L5)                                                                | 1.112e+3              |
| Anxiety/Depression (I am slightly anxious or depressed) (aEQ5D5L5)                                                                | -4.171e+2             |
| How many times did you consult the general practitioner (aTicp1a)                                                                 | 6.831e+1              |
| How many times did you consult a therapist for physical therapy (aTicp1b)                                                         | 2.048e+1              |
| How many times did you consult the Dietician (aTicp1e)                                                                            | 4.193e+1              |
| How many times did you consult other primary care 1 (aTicp1g2)                                                                    | 5.988e+2              |
| How many times did you consult the Psychiatrist (aTicp2d)                                                                         | 1.565e+2              |
| How many times did you consult other mental care 1 (aTicp2h2)                                                                     | -9.298e+1             |
| How many times did you consult the Acupuncturist (aTicp3a)                                                                        | 5.166e+1              |
| How many times: medical specialist at an outpatient clinic (aTicp4)                                                               | 2.459e+2              |
| Times of other institution admissions (aTicp6e2)                                                                                  | -4.074e+2             |
| Medication use (dosage Citalopram (Cipramil)) (aTicp12b)                                                                          | 2.421e+1              |
| Medication use (other period Citalopram (Cipramil)) (aTicp12d2)                                                                   | -3.800e+1             |
| Medication use (Fluoxetine (Prozac)) (aTicp14a)                                                                                   | -6.932e+2             |
| Medication use (other period Nortriptyline (Nortrilen)) (aTicp16d2)                                                               | 2.518e+3              |
| Medication use (other) (aTicp17d1)                                                                                                | -2.363e+3             |
| Medication use (dosage other depressants 1) (aTicp20b)                                                                            | 6.129e+1              |
| Medication use (Frequency Oxazepam (Seresta)) (aTicp22c)                                                                          | -9.576e+1             |
| Medication use (period Oxazepam (Seresta)) (aTicp22d1)                                                                            | -1.410e+3             |
| Medication use (period Zopiclon (Imovane)) (aTicp26d1)                                                                            | 1.424e+3              |
| Medication use (dosage Other Tranquilizers or sleep medication) (aTicp27b)                                                        | 8.460e+0              |
| Medication use (other period for Other medication for mental health complaints) (aTicp29d2)                                       | -4.046e+2             |
| Do you have a paid job (yes) (aTicp39)                                                                                            | 1.052e+3              |
| How many hours does your contract specify (aTicp40)                                                                               | 3.720e+1              |
| Did health problems oblige you to call in sick from work at any time (Yes, I was off work during the full three months) (aTicp42) | 4.242e+3              |
| On which date did you call in sick from work first because of health problems (aTicp43)                                           | -8.500e-5             |
| On how many working days did you call in sick from work because of health problems in the past three months (aTicp45)             | 5.469e+1              |
| Was your job performance adversely affected by health problems (yes) (aTicp46)                                                    | 7.219e+2              |
| Rate how well performed on days bothered by health problems (aTicp48)                                                             | -1.439e+2             |
| What type of treatment do you receive (Medication) (aTreat2a)                                                                     | -8.896e+0             |
| How long have you been taking sleep medication (1-6 months) (atreat10)                                                            | -2.746e+3             |
| How long have you been taking sleep medication (More than 1 year) (atreat10)                                                      | 7.832e+2              |
| Who is providing the sleep medication (Psychiatrist) (atreat11)                                                                   | -6.851e+2             |
| What type of treatment did you receive (Medication) (atreat17)                                                                    | -7.687e+2             |

|                                                                                                                            |           |
|----------------------------------------------------------------------------------------------------------------------------|-----------|
| Suicidal risk current (yes) (amini5a)                                                                                      | 5.668e+2  |
| Recency manic episode (Lifetime) (amini7b)                                                                                 | 3.520e+1  |
| Agoraphobia current (yes) (amini11)                                                                                        | -1.532e+3 |
| Panic disorder without agoraphobia current (amini12)                                                                       | 4.787e+2  |
| Panic disorder with agoraphobia current (yes) (amini13)                                                                    | -3.185e+3 |
| Obsessive compulsive disorder current (yes) (amini16)                                                                      | -7.251e+2 |
| Falling asleep (I take at least 30 minutes to fall asleep, some nights) (aQIDS01)                                          | -2.655e+1 |
| Increased Appetite (I regularly eat more often and or greater amounts of food than usual) (aQIDS07)                        | 6.115e+2  |
| Weightloss (I have lost 2.5 kilos or more) (aQIDS08)                                                                       | -6.544e+2 |
| Weightgain (I have gained 2.5 kilos or more) (aQIDS09)                                                                     | 1.150e+3  |
| Weightgain (I have not had a change in my weight) (aQIDS09)                                                                | 1.029e+1  |
| Concentration/Decision Making (Most of the time, I struggle to focus my attention or to make decisions) (aQIDS10)          | -7.034e+1 |
| Energy level (I have to make a big effort to start or finish my usual daily activities) (aQIDS14)                          | 7.805e+1  |
| Energy level (I really cannot carry out most of my usual daily activities because I just do not have the energy) (aQIDS14) | 1.160e+3  |
| Country code (Germany) (cc)                                                                                                | 4.782e+2  |
| Country code (Poland) (cc)                                                                                                 | -2.842e+3 |
| Country code (Netherlands) (cc)                                                                                            | 4.058e+3  |
| Country code (Spain) (cc)                                                                                                  | -7.364e+2 |
| Country code (UK) (cc)                                                                                                     | 4.058e+3  |

Important baseline features based on Lasso regression for BT (including single levels for each item) and cost prediction for  $\lambda=651.14$ :

| Feature                                                                                                     | Parameter coefficient |
|-------------------------------------------------------------------------------------------------------------|-----------------------|
| (Intercept)                                                                                                 | -1.524e+6             |
| Little interest or pleasure in doing things (Not at all) (aPHQ01)                                           | -5.829e+2             |
| Trouble falling or staying asleep, or sleeping too much (Several days) (aPHQ03)                             | -2.313e+2             |
| Poor appetite or overeating (Nearly every day) (aPHQ05)                                                     | 1.742e+3              |
| Trouble concentrating on things, such as reading the newspaper or watching television (Not at all) (aPHQ07) | -5.504e+2             |
| Willing to carry a Smartphone delivered by treatment team (no) (apref4)                                     | -1.444e+3             |
| Usual activities (I have no problems doing my usual activities) (aEQ5D5L3)                                  | -2.353e+1             |
| Anxiety/Depression (I am moderately anxious or depressed) (aEQ5D5L5)                                        | 1.555e+2              |
| How many times did you consult the industrial physician (aTicp1f)                                           | 5.155e+2              |
| How many times did you consult other primary care 1 (aTicp1g2)                                              | 7.368e+2              |
| How many times did you consult other mental care 3 (aTicp2j2)                                               | 1.621e+2              |
| How many times did you consult the Acupuncturist (aTicp3a)                                                  | 9.675e+2              |
| Nights of regular hospital admissions (aTicp6a2)                                                            | 4.013e+1              |
| Times of other institution admissions (aTicp6e2)                                                            | -2.483e+2             |
| Medication use (Citalopram (Cipramil)) (aTicp12a)                                                           | -7.973e+2             |
| Nights of regular hospital admissions (aTicp15d2)                                                           | -3.801e+2             |
| Medication use (dosage Venlafaxine (Efexor)) (aTicp19b)                                                     | 1.879e+1              |
| Medication use (period Venlafaxine (Efexor)) (aTicp19d1)                                                    | 1.692e+3              |
| Medication use (dosage other depressants 1) (aTicp20b)                                                      | 1.490e+1              |
| Medication use (other antidepressant 2) (yes) (aTicp21a)                                                    | 1.850e+3              |

|                                                                                                                                   |            |
|-----------------------------------------------------------------------------------------------------------------------------------|------------|
| Medication use (dosage other depressants 2) (aTicp21b)                                                                            | 2.358e+2   |
| Medication use (other period Oxazepam (Seresta)) (aTicp22d2)                                                                      | 4.460e+2   |
| Medication use (dosage Other medication for mental health complaints) (aTicp30b)                                                  | 1.348e+3   |
| Do you have a paid job (yes) (aTicp39)                                                                                            | 2.453e+3   |
| How many hours does your contract specify (aTicp40)                                                                               | 5.939e+0   |
| Job questions: over how many days are these hours distributed (aTicp41)                                                           | 1.562e+2   |
| Did health problems oblige you to call in sick from work at any time (Yes, I was off work during the full three months) (aTicp42) | 1.008e+4   |
| On which date did you call in sick from work first because of health problems (aTicp43)                                           | 1.120e-4   |
| On how many working days did you call in sick from work because of health problems in the past three months (aTicp45)             | 1.614e+2   |
| Number of hours you had to catch up on work unable to perform (aTicp49b)                                                          | 5.345e+0   |
| How long have you been in psychotherapy (6 months-1 year) (atreat14c)                                                             | 1.191e+3   |
| How long have you been in psychotherapy (Less than one month) (atreat14c)                                                         | -1.830e+10 |
| What type of treatment did you receive (Psychotherapy) (atreat17)                                                                 | 2.619e+3   |
| Falling asleep (I take at least 30 minutes to fall asleep, some nights) (aQIDS01)                                                 | 9.567e+2   |
| General interest (There is no change from usual in how interested I am in other people or activities) (aQIDS13)                   | -1.854e+3  |
| Energy level (I really cannot carry out most of my usual daily activities because I just do not have the energy) (aQIDS14)        | 2.764e+1   |
| Feeling Restless (I do not feel restless) (aQIDS16)                                                                               | 9.588e+2   |
| Country code (Germany) (cc)                                                                                                       | 2.794e+2   |
| Country code (UK) (cc)                                                                                                            | -2.967e+2  |
